# Supplementary material for: Exploration of the effect of 2,6-(t-Bu)2-4-Me-C6H2OH (BHT) in chain shuttling polymerization
Source: Royal Society of Chemistry journal article supplement (doi:10.1039/c3py00506b), 2013-01-01
Supplement: c3py00506b.pdf [file c3py00506b.pdf]

## SUPPORTING INFORMATION

belonging to the paper:

### Exploration of the effect of BHT in chain shuttling polymerization

Camille Descour, Timo J. J. Sciarone, Dario Cavallo, Tibor Macko, Mauritz Kelchtermans, Ilia

Korobkov, Robbert Duchateau

**Table S1.** Chain Shuttling Polymerization semi-batch experiments, at low 1-C<sub>8</sub><sup>=</sup> loading (10 mL unless stated otherwise).

| Entry             | Catalysts | Monomers                                                          | MAO    | BHT    | ZnEt <sub>2</sub> | Yield (g) | M <sub>n</sub> (g/mol) | PDI | T <sub>m</sub> (°C) |
|-------------------|-----------|-------------------------------------------------------------------|--------|--------|-------------------|-----------|------------------------|-----|---------------------|
| MAO only          |           |                                                                   |        |        |                   |           |                        |     |                     |
| S1                | Hf/Zr     | C <sub>2</sub> <sup>=</sup> + C <sub>8</sub> <sup>=</sup>         | 1000eq | /      | /                 | 5.2       | 4.680                  | 1.5 | 123.7               |
| S2                | Hf/Zr     | C <sub>2</sub> <sup>=</sup> + C <sub>8</sub> <sup>=</sup>         | 500eq  | /      | /                 | 8.6       | 10.100                 | 1.9 | 127.2               |
| S3                | Hf/Zr     | C <sub>2</sub> <sup>=</sup> + C <sub>8</sub> <sup>=</sup>         | 250eq  | /      | /                 | 8.6       | 33.800                 | 2.6 | 129.8               |
| MAO + BHT         |           |                                                                   |        |        |                   |           |                        |     |                     |
| S4                | Hf/Zr     | C <sub>2</sub> <sup>=</sup> + C <sub>8</sub> <sup>=</sup>         | 500eq  | 500 eq | /                 | 3.1       | 133.400                | 2.0 | 130.2               |
| S5                | Hf/Zr     | C <sub>2</sub> <sup>=</sup> + C <sub>8</sub> <sup>=</sup>         | 500eq  | 250 eq | /                 | 3.3       | 121.500                | 2.0 | 128.6               |
| S6                | Hf/Zr     | C <sub>2</sub> <sup>=</sup> + C <sub>8</sub> <sup>=</sup>         | 500eq  | 50 eq  | /                 | 9.0       | 51.900                 | 2.6 | 130.0               |
| S7                | Hf/Zr     | C <sub>2</sub> <sup>=</sup> + C <sub>8</sub> <sup>=</sup> (50mL)  | 500eq  | 250 eq | /                 | 4.1       | 139.600                | 2.9 | 118.9               |
| S8                | Hf/Zr     | C <sub>2</sub> <sup>=</sup> + C <sub>8</sub> <sup>=</sup> (100mL) | 500eq  | 250 eq | /                 | 2.7       | 82.200                 | 2.2 | 110.1               |
| MAO + (BHT) + DEZ |           |                                                                   |        |        |                   |           |                        |     |                     |
| S9                | Hf/Zr     | C <sub>2</sub> <sup>=</sup> + C <sub>8</sub> <sup>=</sup>         | 500eq  | /      | 50 eq             | 6.8       | 10.100                 | 1.7 | 128.0               |
| S10               | Hf/Zr     | C <sub>2</sub> <sup>=</sup> + C <sub>8</sub> <sup>=</sup>         | 500eq  | 250 eq | 50 eq             | 6.3       | 12.200                 | 1.6 | 129.7               |

Conditions: 5 μmol each catalyst, 11 μmol DMAHBF<sub>20</sub>, unless stated otherwise, 500 mL IsoparE. 1L PREMEX reactor, 130 °C and 30 min run. 5 bars ethylene.

NB: Experimentally, it does not make a difference to add MAO/BHT together or first MAO for 1h (to scavenge) and then only BHT.

**Table S2.** Chain Shuttling Polymerization semi-batch experiments, use of different scavengers.

| Entry | Catalysts | Monomers                                                  | Scavenger | BHT     | ZnEt <sub>2</sub> | Yield (g) | M <sub>n</sub> (g/mol) | PDI | T <sub>m</sub> (°C) |
|-------|-----------|-----------------------------------------------------------|-----------|---------|-------------------|-----------|------------------------|-----|---------------------|
| 12114 | Hf/Zr 3/1 | C <sub>2</sub> <sup>=</sup> + C <sub>8</sub> <sup>=</sup> | MMAO-3A   | 250 eq  | /                 | 22.1      | 22.900                 | 3.3 | 110.5               |
| 12115 | Hf/Zr 3/1 | C <sub>2</sub> <sup>=</sup> + C <sub>8</sub> <sup>=</sup> | MMAO-3A   | 250 eq. | 10 eq.            | 21.3      | 4.700                  | 1.7 | 111.8               |
| 1237  | Hf/Zr     | C <sub>2</sub> <sup>=</sup> + C <sub>8</sub> <sup>=</sup> | D 500 eq  | 250 eq  | /                 | 10.4      | 49.600                 | 3.3 | 115.8               |
| 1232  | Hf/Zr     | C <sub>2</sub> <sup>=</sup> + C <sub>8</sub> <sup>=</sup> | D 500 eq  | 250 eq  | 10 eq             | 16.0      | 16.500                 | 2.3 | 119.3               |
| 1246  | Hf/Zr     | C <sub>2</sub> <sup>=</sup> + C <sub>8</sub> <sup>=</sup> | D 500 eq  | 50 eq   | 10 eq             | 23.1      | 9.800                  | 1.9 | 112.9 sh            |
| 1224  | Hf/Zr     | C <sub>2</sub> <sup>=</sup> + C <sub>8</sub> <sup>=</sup> | D 500 eq  | /       | 10 eq             | 30.8      | 5.300                  | 2.1 | 114.7               |

Conditions: 5 μmol each catalyst, unless stated otherwise, 11 μmol DMAHBF<sub>20</sub>, 500 mL IsoparE. 1L PREMEX reactor, 130 °C and 30 min run. 5 bars ethylene. 100 mL 1-octene, unless stated otherwise.

**Table S3.** Additional NMR data on the Cluster Index for the materials presented in Table 3.

| Entry | Cat.  | Ratio | BHT    | ZnEt <sub>2</sub> | Yield (g) | M <sub>n</sub> <sup>a</sup> (g/mol) | PDI | T <sub>m</sub> (°C) | ΔH (J/g) | Density | 1-C <sub>8</sub> <sup>=</sup> mol (wt) % | C.I. <sup>c</sup> |
|-------|-------|-------|--------|-------------------|-----------|-------------------------------------|-----|---------------------|----------|---------|------------------------------------------|-------------------|
| 2     | Zr    | /     | /      | /                 | 22.5      | 10.100                              | 2.1 | 116.1               | 133.9    | 0.934   | 3.47 (12.56)                             | 8.85              |
| 4     | Hf    | /     | /      | /                 | 7.3       | 3.700                               | 3.6 | /                   | /        | n.d.    | 27.39 (60.15)                            | 5.60              |
| 13    | Hf    | /     | 250 eq | /                 | 2.6       | 72.700                              | 9.9 | 120.5               | 9.5      | 0.899   | 24.95 (57.08)                            | 7.14              |
| 5     | Hf/Zr | /     | /      | /                 | 22.3      | 10.900                              | 2.2 | 116.0               | 120.6    | 0.933   | 4.78 (16.71)                             | 27.61             |
| 7     | Hf/Zr | /     | 250 eq | /                 | 13.5      | 59.600                              | 3.3 | 116.4               | 105.3    | 0.934   | 3.26 (11.89)                             | 43.29             |
| 17    | Hf/Zr | /     | 250 eq | 10 eq             | 17.1      | 15.700                              | 2.1 | 119.1               | 124.4    | 0.937   | 2.31 (8.64)                              | 16.67             |
| 18    | Hf/Zr | 5/1   | 250 eq | /                 | 5.70      | 66.500                              | 5.8 | 114.5               | 50.2     | 0.907   | 11.62 (34.47)                            | 16.04             |



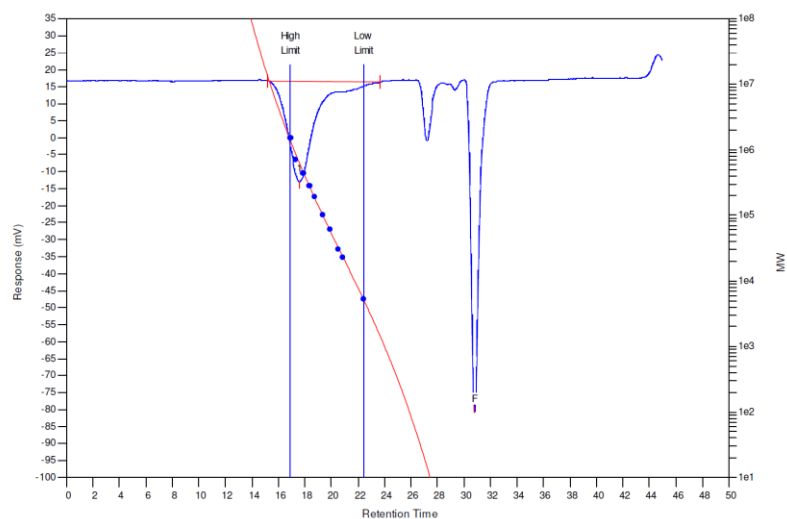

Figure S3. HT SEC plot of entry 13.

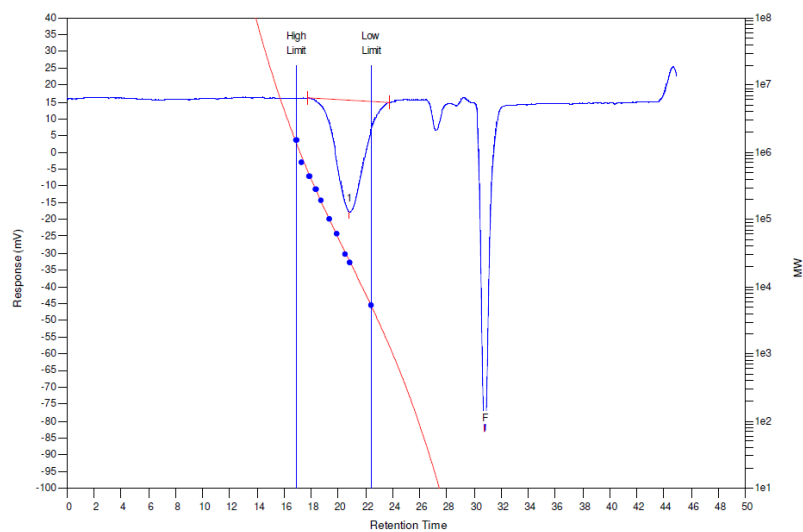

Figure S4. HT SEC plot of entry 17.

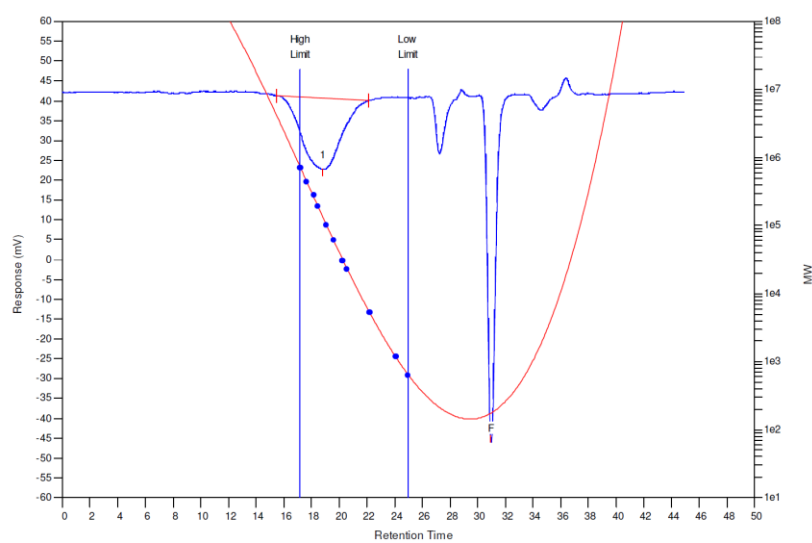

Figure S5. HT SEC plot of entry 18.

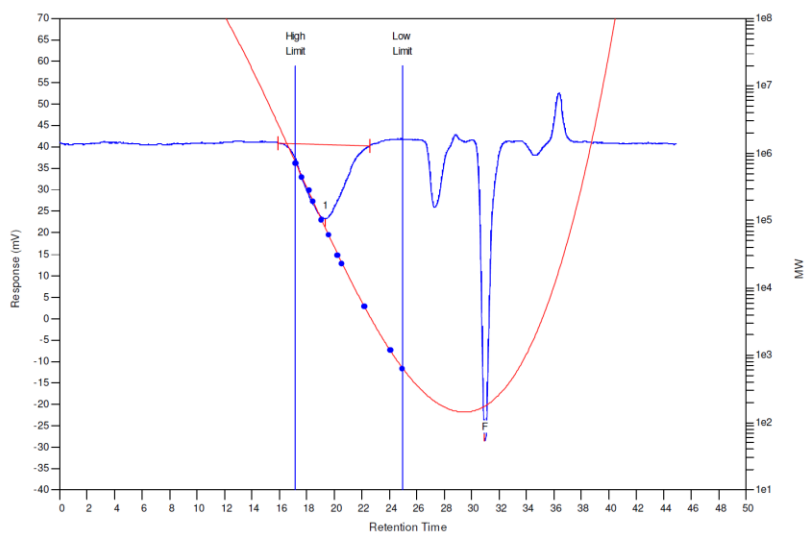

Figure S6. HT SEC plot of entry 19.

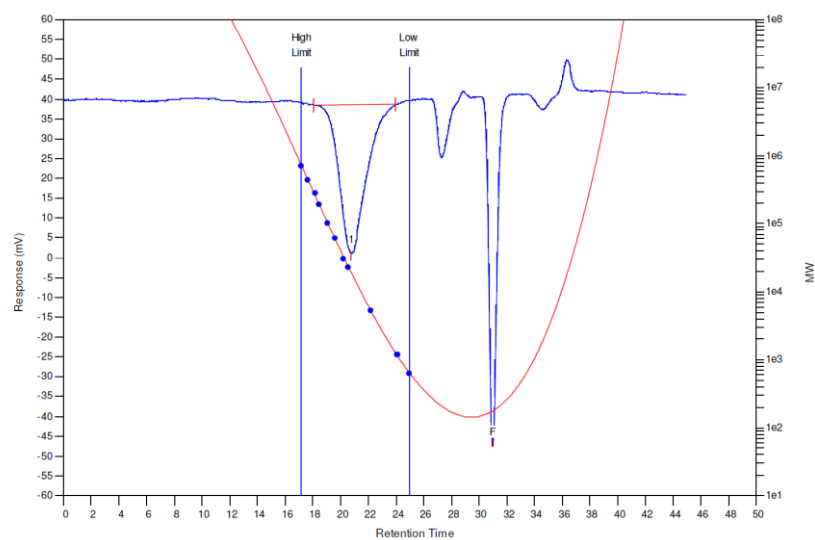

Figure S7. HT SEC plot of entry 20.

Table S4. Crystal collection and refinement data.

|                                               | 4                                                | 5                                                              |
|-----------------------------------------------|--------------------------------------------------|----------------------------------------------------------------|
| formula                                       | C <sub>32</sub> H <sub>51</sub> AlO <sub>2</sub> | C <sub>34</sub> H <sub>56</sub> O <sub>2</sub> Zn <sub>2</sub> |
| FW                                            | 494.71                                           | 627.57                                                         |
| cryst. dim. (mm)                              | 0.33 x 0.30 x 0.26                               | 0.44 x 0.37 x 0.33                                             |
| colour, habit                                 | colorless, block                                 | colorless, block                                               |
| crystal system                                | triclinic                                        | orthorhombic                                                   |
| Space group, no. <sup>i</sup>                 | P <sub>1</sub> , 2                               | Pbca, 61                                                       |
| <i>a</i> (Å)                                  | 10.9975(11)                                      | 17.7224(11)                                                    |
| <i>b</i> (Å)                                  | 12.3835(11)                                      | 9.6794(6)                                                      |
| <i>c</i> (Å)                                  | 13.3184(12)                                      | 19.2480(11)                                                    |
| <i>α</i> (°)                                  | 65.237(4)                                        | 90                                                             |
| <i>β</i> (°)                                  | 75.393(4)                                        | 90                                                             |
| <i>γ</i> (°)                                  | 69.574(4)                                        | 90                                                             |
| <i>Z</i>                                      | 2                                                | 4                                                              |
| <i>V</i> (Å <sup>3</sup> )                    | 1531.4(3)                                        | 3301.8(3)                                                      |
| <i>ρ</i> <sub>calc</sub> (g/cm <sup>3</sup> ) | 1.0729(2)                                        | 1.2625(1)                                                      |
| <i>θ</i> range (°)                            | 2.33-28.29                                       | 3.12-28.29                                                     |
| <i>λ</i> (Å) (Mo-K <sub>α</sub> )             | 0.71073                                          | 0.71073                                                        |
| <i>T</i> (K)                                  | 200(2)                                           | 200(2)                                                         |

|                                                   |                |                |
|---------------------------------------------------|----------------|----------------|
| # meas. refl.                                     | 24101          | 58913          |
| # unique refl.                                    | 7448           | 4048           |
| # param.                                          | 316            | 172            |
| weighting scheme; a,b <sup>[a]</sup>              | 0.1028, 0.5326 | 0.0420, 2.5700 |
| $R(F)$ for $F_0 \geq 4\sigma(F_0)$ <sup>[b]</sup> | 0.553          | 0.0289         |
| $wR(F^2)$ <sup>[c]</sup>                          | 0.1718         | 0.0827         |
| GoF <sup>[d]</sup>                                | 1.019          | 1.002          |

[a]  $w = 1/[\sigma^2(F_o^2) + (aP)^2 + bP]$ ,  $P = [\max(F_o^2, 0) + 2F_c^2] / 3$  [b]  $R(F) = \sum (||F_o| - |F_c||) / \sum |F_o|$  [c]  $wR(F^2) = [\sum [w(F_o^2 - F_c^2)^2] / \sum [w(F_o^2)^2]]^{1/2}$  [d]  
GoF =  $[\sum [w(F_o^2 - F_c^2)^2] / (n-p)]^{1/2}$ , n = # refl., p = # param. refined.

---

<sup>i</sup> *International Tables for Crystallography; Kluwer Academic Publishers; Dordrecht, The Netherlands, 1992.*
